# Supplementary material for: A strategic expression method of miR-29b and its anti-fibrotic effect based on RNA-sequencing analysis
Source: PubMed Central journal article supplement (PMC7746150; doi:10.1371/journal.pone.0244065), 2020-12-17
Supplement: pone.0244065.s001.pdf [file pone.0244065.s001.pdf]

Support Information

This Support Information include the Uncropped and Unadjusted Western Blot images.  
Original Western Blot for Fig 6A and Fig 6B.

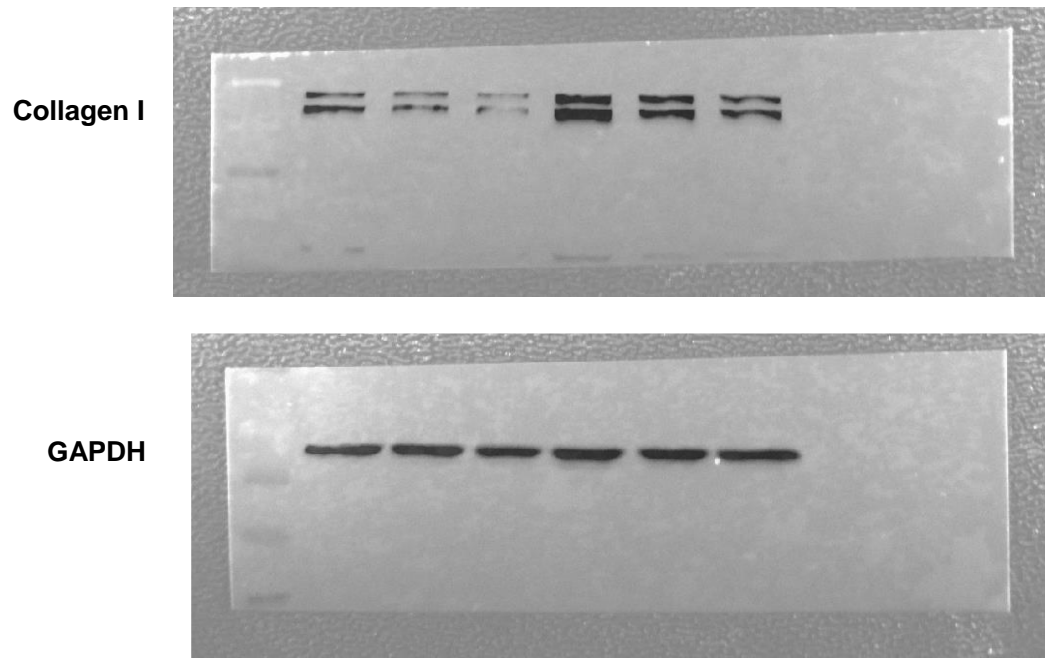

**Fig 6A Full Western Blot**

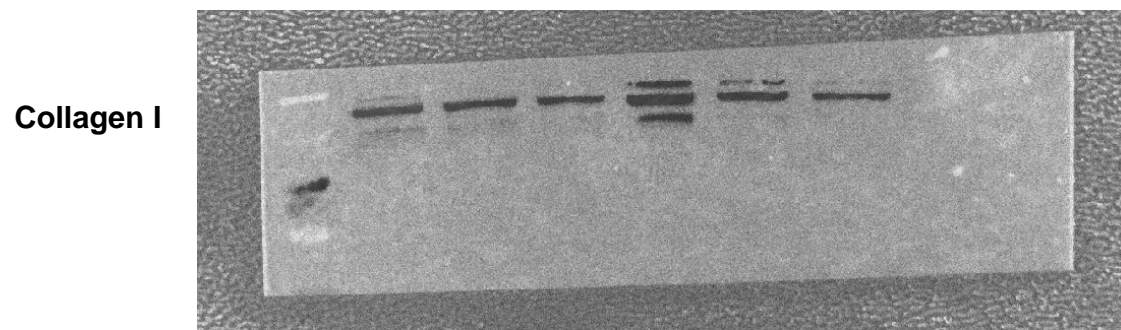

**Fig 6B Full Western Blot**
